# Long distance homing in the cane toad (*Rhinella marina*) in its native range

Daniel A. Shaykevich<sup>1\*</sup>, Andrius Pašukonis<sup>1,2</sup>, Lauren A. O'Connell<sup>1\*</sup>

<sup>1</sup>Stanford University, Department of Biology, 371 Jane Stanford Way, Stanford, CA 94305

<sup>2</sup>CEFE, Univ Montpellier, CNRS, EPHE, IRD, Montpellier, France

**Keywords:** Amphibians, Animal movement, Space Use, Tracking, Translocation, Navigation

\*To whom correspondence should be addressed: Daniel Shaykevich

Department of Biology  
Stanford University  
371 Jane Stanford Way  
Stanford, CA 94305  
shaykeda@stanford.edu

Lauren A. O'Connell  
Department of Biology  
Stanford University  
371 Jane Stanford Way  
Stanford, CA 94305  
loconnel@stanford.edu

## Abstract

Many animals exhibit complex navigation over different scales and environments. Navigation studies in amphibians have largely focused on species with life histories that require accurate spatial movements, such as territorial poison frogs and migratory pond-breeding amphibians

that show fidelity to mating sites. However, other amphibian species have remained relatively understudied, leaving open the possibility that well-developed navigational abilities are widespread. Here, we measured short-term space use in non-territorial, non-migratory cane toads (*Rhinella marina*) in their native range in French Guiana. After establishing site fidelity, we tested their ability to return home following translocations of 500 and 1000 meters. Toads were able to travel in straight trajectories back to home areas, suggesting navigational abilities similar to those observed in amphibians with more complex spatial behavior. These observations break with the current paradigm of amphibian navigation and suggest that navigational abilities may be widely shared among amphibians.

## Résumé

Un grand nombre d'animaux présentent une navigation complexe à différentes échelles et dans des environnements variés. Les études portant sur la navigation des amphibiens se sont, en vaste majorités, intéressées aux espèces dont le cycle de vie nécessite des mouvements précis, telles que les Dendrobates territoriales qui transportent leurs têtards depuis leur sites de ponte ou comme les amphibiens migrants qui se reproduisent dans les étangs et qui sont fidèles à leurs sites de reproduction. Cependant, d'autres espèces ont été relativement peu étudiées et ces capacités de navigation pourraient être bien plus répandues au sein des amphibiens. Lors de ces travaux, nous avons quantifié l'utilisation de l'espace à court terme d'une espèce de crapaud non territorial et non migrateur (Crapaud buffle, *Rhinella marina*), dans son habitat naturel en Guyane Française. Après avoir confirmé la fidélité de chaque individu à son domaine vital, nous avons testé leur capacité à y retourner après un déplacement entre 500 et 1000 mètres. Les crapauds étaient capables de retourner vers leur sites de capture de manière directe et rectiligne. Ceci suggère qu'ils possèdent des capacités de navigation analogues à celles observées chez les amphibiens présentant un comportement spatial plus complexe. Ces observations contredisent la théorie actuelle sur la navigation des batraciens et

suggèrent que les capacités de navigation pourraient être plus largement partagé au sein de leur familles.

## Introduction

Many animals navigate for foraging, migration, or reproduction, from tiny ants to huge whales (Allen, 2013; Wittlinger et al., 2006). Long distance navigation has been extensively studied in species, such as sea turtles and migratory birds, offering dramatic examples of large-scale movement (Lohmann et al., 2004; Mouritsen, 2018; Mouritsen and Ritz, 2005). Such studies have been instrumental in uncovering mechanisms, like magnetoreception, that allow for accurate navigation. However, navigational abilities of many species that are largely sedentary or that live within relatively small areas are comparatively understudied. Even if these animals do not often exhibit notable navigational behaviors, they may still have homing abilities similar to those studied in organisms known for such abilities. Here, we tested the ability of the cane toad (*Rhinella marina*), a non-territorial and non-migratory nocturnal amphibian (Zug and Zug 1979) to return to its home site following translocations exceeding typical movements.

Most studies of amphibian navigation have been conducted in migratory species (Phillips et al., 1995; Sinsch, 2006). For example, the European common toad (*Bufo bufo*) migrates up to three kilometers for breeding and can return to breeding sites in straight trajectories following displacements (Sinsch, 1987). Multiple salamander species can home to breeding sites (Sinsch, 1991) and displacement studies of the Californian Red-Bellied newt *Taricha rivularis* show they can return to natal streams from more than four kilometers (Twitty et al., 1964). More recently, Neotropical poison frogs (*Aromobatidae* and *Dendrobatidae*) have been increasingly studied for navigational abilities because of their complex parental care behaviors (Liu et al., 2019;

Pašukonis et al., 2014a; Pašukonis et al., 2018; Roland and O'Connell, 2015; Stynoski, 2009).

Three-Striped poison frog (*Ameerega trivittata*) males can navigate back to home territories following displacements of up to 800 m, exhibiting an ability to return from distances exceeding regular movements (Pašukonis et al., 2018). However, limited effort has been directed at studying navigation in anurans (frogs and toads) that do not exhibit complex spatial behaviors or the need for well-developed navigational abilities. With this study, we begin to characterize space use and navigational ability in a non-territorial, non-migratory amphibian species that does not provide parental care and does not have other known life history traits suggestive of highly developed navigation.

Adult cane toads are large, nocturnal, water breeding amphibians ubiquitous throughout their native range from the southern tip of Texas into South America (Amphibiaweb; Zug and Zug 1979; DeVore et al. 2021; Freeland and Kerin, 1991). Females lay thousands of eggs at once in a variety of water sources available in local habitats, from moving creeks and rivers to temporary shallow pools (Evans et al., 1996; Hamilton et al., 2005). Though mostly native to tropical rainforests, cane toads have gained international notoriety as an invasive species, most famously in Australia. Cane toads were introduced in northeast Australia in the 1930's and have continuously spread to encompass over 1 million square kilometers with ongoing invasive fronts expanding at up to 50 kilometers per year (Urban et al., 2008). The variation in behaviors between native and invasive cane toads has created a dichotomy in the characterization of their spatial behaviors. Native toads and those introduced to areas not environmentally conducive for range expansion are viewed as relatively sedentary and do not perform tasks requiring precise navigation (Pettit et al., 2016; Ward-Fear et al., 2016; Zug and Zug, 1979). Toads on the invasive front in Australia are considered nomadic or dispersive (Brown et al., 2014; Schwarzkopf and Alford, 2002), and while they may move large distances, they do not seem to navigate towards a specific goal during dispersal.

Numerous studies have examined how and when invasive Australian cane toads move and the physiological characteristics affecting their space use (Brown et al., 2006; Kelehear and Shine, 2020; Phillips and Shine, 2005; Phillips et al., 2007). Though the spatial ecology of invading toads differs from that of native range toads, general activity patterns are consistent between populations (DeVore et al., 2021). However, despite a few reports on homing in cane toads (Brattstrom, 1962; Boland, 2004), no work has systematically quantified the navigational ability of cane toads using tracking methods. To characterize short-term space use and determine whether cane toads are capable of long-range navigation to a specific goal, we tracked toads and carried out translocation-homing experiments in their native rainforest habitat.

## Methods

### *Animals*

The experiment was carried out around the Saut Pararé camp (4°02' N - 52°41'W) of the Nouragues Ecological Research Station in the Nature Reserve Les Nouragues, French Guiana from January to March 2020 (the experiment was terminated early by evacuation due to the COVID-19 pandemic). The area is largely composed of primary lowland rainforest and is bordered by the Arataï river to the south.

Toads were mostly found by visual search at night but were also located during the day in some instances. Upon capture, toads were photographed, measured snout to vent (SVL), and weighed with a hanging scale (Basetech HS-51, Basetech, Winnipeg, MB, Canada). Animals were captured and tagged (Figure 1) over a transect 300 meters long near the Arataï river encompassing ~9300 m<sup>2</sup>. Individuals were identified by dorsal coloration and wart patterns. A total of five females and nine males were tagged over the course of the experiment. Sex was

determined by size, male release calls, and recorded instances of amplexus. Five captured females weighed an average of 1.22 kg (0.57-1.93 kg) and had an average SVL of 21.8 cm (18.0-24.0 cm); nine captured males had an average mass of 0.36 kg (0.27-0.47 kg) and an average SVL of 15.0 cm (11.5-18.0 cm). Females were larger than males when measured for both SVL (t-test,  $p < 0.05$ ) and mass (independent 2-group Mann-Whitney U Test,  $p < 0.05$ ).

#### *Tagging and baseline tracking*

A radio tag (BD2, Holohil Systems Ltd, Carp, ON, Canada) was secured to a piece of 2 - 4 mm silicone tubing (Dow Corning, Midland, MI, USA,) and sized to sit loosely above the toad's waist and legs but tightly enough that it would not slip off (Figure 1). The ends of the tubing were attached to form a loop around the toad using cotton thread, so that if the toad was to escape with the tag, the thread would disintegrate over time and free the toad. Total tag weight was less than 2 grams and negligible compared to toad mass. Tagged animals were released at their capture site after an average of 36.9 minutes (18-107 minutes). A GPS point was recorded on a handheld GPS device (RINO655t, Garmin Ltd., Schaffhausen, Switzerland) using the waypoint averaging feature. Two toads lost tags on three total occasions, and when they were recaptured, they were identified by dorsal wart and coloration patterns and retagged.

After release, most toads were relocated twice every 24 hours during both day and night with a flexible 3-element Yagi antenna (Biotrack Ltd, Wareham, Dorset, UK) and a SIKA radio receiver (Biotrack Ltd). Attempts were made to stay two meters away from the animals, which was sometimes difficult given the brushy environment and the need to visually validate that the transmitter was attached to the animal. Some individuals were only generally localized using the antenna without visual confirmation or a specific position being recorded on some days. To account for GPS inaccuracy, toad location was recorded as a new point if the GPS plotted the spot as being at least 5 m away from the previous location of the animal. Every week, animals were captured and inspected for any tagging-related injuries. In two instances a tag was

removed because of a skin injury during baseline tracking, including one female who was untagged for ~3 weeks after an initial 3 weeks of tagging to recover from abrasions from the waistband, and was then retagged and tracked again.

The location of each individual was recorded over at least seven days (both before and after translocations) and toads tracked for shorter durations were not included in our analyses. For our study, we considered toads to show short-term site fidelity if they showed non-unidirectional movements, repeated use of sites, and/or remained within a small, restricted area in comparison to their movement capacity. Site fidelity was determined through field observations, inspection of the individual trajectories, and the distribution of relative turn angles for each toad during baseline tracking. Clustering of relative turns around 0 degrees indicates unidirectional movement, while turns around 180 degrees indicates complete reversals in direction and repeated use of previously visited areas, which we also confirmed in the field. We excluded one toad (Figures 2B, S1C, S2C) out of eleven tracked for at least seven days (seven males and four females) from translocation experiments due to unidirectional movement. Additionally, we excluded a second toad that was translocated across a river from his original home area while in amplexus (Figure 2C, S1I, S2I).

### *Translocations*

After animals had been tracked for at least three days, they were captured and translocated 500 or 1000 meters in evening or nighttime. After capture, toads were transported and disoriented by walking them around in a net cage for 30-60 minutes prior to release. Six individuals (five males and one female) were translocated 500 meters and five individuals (four males and one female) were translocated 1000 m. Overall, seven individuals were used in translocations (four toads experienced trials of both distances). Translocations were repeated for 500 and 1000 m within the same animal, in random sequence, although evacuation during the COVID-19

pandemic prohibited repeated sampling for all individuals. Translocation sites were varied as much as possible despite several constraints, including the river to the south, a steep hill to the north, and a need for trail access for safe nocturnal working conditions. The release site was determined from the “outermost” baseline point for the individual as estimated on a local GIS map with ArcPad 10.2 (ESRI, Redlands, CA, USA) and confirmed with a GPS device in the field.

After translocation, toads were again located once during the day and once during the night in a 24-hour period. If possible, depending on the toad’s proximity to the camp, multiple points were taken during the night if the animal was moving, starting in the early evening. Locations were recorded in the same manner as had been done to determine home area. Animals were given ten days to return home. If they did not return after ten days, they were returned home manually. Similarly, if the animal exhibited any extended periods of immobility (>72 hrs), they were captured, and their waists checked for rubbing or wounds. One toad was injured and so the tag was removed, and the animal was released at the home site. Animals were considered in their home area once they were within 100 meters of the translocation reference point based upon the movement range observed during baseline tracking. Following translocations, all animals were successfully untagged and released in their home areas.

### *Data Analysis*

GPS data were uploaded into ArcGIS Pro 2 (ESRI) to visualize baseline points and homing trajectories. Temporal and spatial attributes of baseline activity and homing were calculated in R version 4.0.2 (R Foundation for Statistical Computing, Vienna, Austria) using the package “adehabitatLT” (Calenge, 2020a). Baseline range (maximum distance between two baseline points) was calculated by visually selecting and exporting outermost baseline points in ArcGIS



and calculating distance in R. Total movement (cumulative path observed) was calculated by creating trajectory objects for individuals in `adehabitatLT`. The package “`adehabitatHR`” (Calenge, 2020b) was used to calculate Minimum Convex Polygons (MCPs) for baseline data. Coordinates of the mean center of baseline activity were calculated in ArcGIS. To account for the variability in the baseline tracking durations, we calculated the movement per day of observation as well as the proportion of days with larger ( $> 10$  m) movements. For these calculations, any period greater than 48 hours in which toad location was not recorded was discarded. Straightness of homing trajectories was calculated by dividing the distance between the translocation release site and the point at which the toad was considered home by the cumulative movement measured. A straightness index of 1 indicates a toad that travelled in a completely straight line, with values approaching 0 indicating less direct routes taken. Normality of data was determined by Shapiro-Wilks Test. Comparisons for normal data were performed with a t-test and comparisons of non-parametric data were performed with a Mann-Whitney U Test. All statistical tests of significance were performed in R (version 4.0.2).

### *Permits and Ethical Statement*

The experiments were conducted in strict accordance with French and USA laws and following the ‘Guidelines for use of live amphibians and reptiles in the field and laboratory research’ by the Herpetological Animal Care and Use Committee (HACC) of the American Society of Ichthyologists and Herpetologists (Beaupre et al., 2004) and the Association for the Study of Animal Behaviour (ASAB) “Guidelines for the treatment of animals in behavioral research and teaching” (Vitale et al., 2018). This experiment was performed under approval from the scientific committee of the Nouragues Ecological Research Station. All procedures were approved by the Institutional Animal Care and Use Committee of Stanford University (protocol #33714).

## Results

### *Baseline Tracking*

Ten toads out of eleven exhibited site fidelity during 7-55 tracking days (mean = 24 days, s.d. = 15 days). Adjusting for periods of at least 48 hours in which observations of position were not made, space use was quantified over 7-32 days (mean = 18 days, s.d. = 10 days). The observed range of the ten toads (Figures 2A, S1) varied from 26.8 meters to 236.7 meters (mean = 109.6 meters, s.d. = 73.9). The sample size was not large enough to detect a sex difference. On average, toads moved more than 10 m on 60% of days of observation, with many periods lacking substantial movement.

During baseline tracking, males were observed more often and in higher density than females. A minimum convex polygon encapsulating the mean centers of the seven males exhibiting site fidelity measured 858.6 m<sup>2</sup>. In contrast, a minimum convex polygon for the mean centers of the three females exhibiting site fidelity measured 8328.8 m<sup>2</sup>. Many other males were observed within the vicinity of the tracked males.

One female toad not exhibiting site fidelity (Figures 2B, S1C, S2C) was tracked for 16 days and moved a cumulative distance of 1999.4 m for a 1779.2 m displacement. Another male toad exhibited site fidelity until it was displaced more than 300 meters across the river to an island by an untagged female while in amplexus (Figures 2C, S1I, S2I). The male was first observed in amplexus in its home area and relocated on the other side of the river four days later. The toad was untagged after 15 days on the island (of which it was in amplexus for 6) and did not return to its previous location for the duration of the observation.

### *Translocations and Homing*

Of the six individuals translocated 500 meters, five returned to their home areas within three days (Figure 3A). Returns were observed between 27.5 and 79.9 hours after release at the translocation site (mean = 57.5 hours, s.d. = 21.6 hours) (Figure 3B). Observed straightness of four homing paths with en route relocations varied from 0.89 to 0.98 (mean = 0.94, s.d. = 0.04), indicating that the toads returned directly with minimal exploration. One individual did not return home, traveling 250 meters in the wrong direction before returning to its translocation site. This toad was manually returned home because of observed abrasions from the belt following 2 days of no movement.

Of the five individuals translocated 1000 m, two returned to home sites within ~5 days (Figure 3C). Returns took 123.7 and 118.7 hours (Figure 3D). Both returned directly with measured straightness of 0.94. Both animals were observed to make their first substantial movements after 24 hours post-translocation (24.25 and 26.67 hours) and exhibited secondary periods of immobility following this initial movement. Two of the toads that did not return home initially moved in the correct direction before stopping prior to reaching their home areas. The remaining individual moved ~500 m in the wrong direction before becoming stationary.

### **Discussion**

The study of navigation has focused on animals that move large distances or perform tasks requiring fine scale navigation, leaving the abilities of other species capable of precise navigation overlooked. We showed for the first time that cane toads directly navigate back to home sites following translocations of up to one kilometer.

Using radio-tracking of toad movements prior to translocation, we found that toads were largely sedentary without translocation and movements were largely nocturnal, similar to previous observations in native and invasive cane toads (Carpenter and Gillingham, 1987; DeVore et al., 2021; Ward-Fear et al., 2016; Zug and Zug, 1979). This is in line with another recent study tracking cane toads in French Guiana that showed small displacements in rainforest toads when compared to coast dwelling cane toads (DeVore et al., 2021). We did not observe larger scale foraging movements (>100 meters) that have been reported in coastal toads, although the movement of a female toad for almost 2 kilometers greatly exceeds any movements reported in coastal or rainforest sites in French Guiana. Overall, our observations generally align with previous studies, although more research is needed to gain a better understanding of cane toad movement ecology and how it covaries with biotic and abiotic factors.

During our tracking, males were clustered in relatively high density by the river, with females spread out in the surrounding area. These observations suggest female cane toads may move to areas populated by males to mate and then return to their original home areas, but detailed long-term tracking studies are needed to understand sex specific spatial distribution and movements. Studies of invasive toads in Hawai'i have shown some sex differences in space use, but not necessarily with respect to range and total inhabited area (Ward-Fear et al., 2016). Previous tracking of native-range toads showed that the only variable affected by sex was the probability of emerging to forage, with males more likely to emerge (Devore et. al, 2021), although we did not quantify this behavior in this study. Our observations of large scale movements are comparable to those recorded in invasive toads (Schwarzkopf and Alford, 2002; Ward-Fear et al., 2016), but similar observations have not been previously reported in native-range cane toads. In Australia, the available range for expansion may contribute to their propensity to disperse (Brown et al., 2014; Phillips et al., 2006). A longer-term space use study

is necessary to better characterize full range and complexity of cane toad movement in their native habitat.

Toads showed the ability to directly navigate back to home sites following translocations of 500 and 1000 m. A previous homing study in Panama showed that cane toads could return to specific lights to hunt for insects following short distance translocations of <100 meters (Brattstrom, 1962). In Australia, some cane toads could return from over a kilometer to bird ground nests they had exploited for food (Boland, 2004). Despite a very different life history and nocturnal activity, cane toads show similar navigational accuracy to poison frogs homing in the same habitat from lesser distance (Pašukonis et al., 2014b) and straighter trajectories than poison frogs moving comparable distances (Pašukonis et al., 2018), although this may be partially attributable to the lower resolution of toad trajectories. This straightness of the homing behavior contrasts with the general meandering of regular movements made by native range toads, shown in Devore et. al (2021) and the current study (Figure S2). Similar to poison frogs, toads were initially stationary at their translocation sites, suggesting a period of gathering bearings (Pašukonis et al., 2014a; Pašukonis et al., 2014b; Pašukonis et al., 2018). Even toads that did not home successfully showed the ability to orient, with two of the three toads that did not return from 1000 meters moving in the correct direction before stopping short of their observed home area. Our study period was unusually dry for the field site, and it did not rain for the duration of these translocations. Cane toads have different spatial behaviors based upon rainfall and the availability of water resources (DeVore et al., 2021), and the failure to home in our study may potentially have been due to stopping at available water resources. Overall, toads demonstrated a capacity to return with accuracy to their home areas from distances that exceeded their observed regular movements and ranges.

The sensory mechanisms that allow for this homing are unknown. Magnetoreception and olfaction have been shown to play an important role in navigation in other bufonid species in smaller scale translocations (Sinsch, 1990; Sinsch, 1987; Sinsch, 1992). It is possible that auditory taxis to male calling contributed to homing since males were largely congregated in one area. However, males were not calling throughout the entire study, and it is unlikely that calls would travel a kilometer through dense forest. The use of visual cues is unlikely given that toads did not explore the area and the dense rainforest understory results in many obstacles. Simple olfactory taxis to water also seems unlikely in the case of successfully returning animals, given that toads could have returned to stretches of river closer to their translocation sites (Figure 3E). More likely is that multiple sensory modalities are involved and contribute to various stages of navigation. The potential for the use of multiple navigation mechanisms (beaconing, path integration, etc.) have been described in amphibians (Sinsch, 2006) and more research is needed to identify which of these paradigms are applicable to the cane toad's apparent ability to navigate. In addition, translocations exceeding the distances of maximum observed movements (in this case ~ 2 km) should be executed to determine whether toads rely on previous experiences to navigate.

Our observations show that cane toads are capable of navigation over long distances after displacement from a home area, suggesting navigational abilities may be widely shared among amphibians. Cane toads are common, large, and invasive amphibians able to carry biologging devices (like accelerometers and GPS), making them particularly interesting for field and lab studies on amphibian navigation. Future research could include testing toad navigation during manipulation of sensory systems to identify which sensory cues are important for navigation, as well as identifying the neural basis of navigation in amphibians.

## Acknowledgements

We would like to thank the technical team of the Nouragues Ecological Research Station for their support: Wémo Betian, Patrick Chatelet, Elodie Courtois, Philippe Gaucher, Florian Jeanne, Bran Leplat, and Nina Marchand. We would also like to thank Agaci Dutra de Souza for transportation of personnel and equipment, and Charles Albert Tropée for piloting our COVID-19 evacuation flight. We are grateful to the staff of the Nouragues Nature Reserve for their commitment to preserving our natural world. This work is part of a partnership between AP and the Nouragues Nature Reserve aimed at improving and spreading the knowledge about amphibians. We thank Marie-Therese Fischer and Matthew Greenlees for reading this paper and providing invaluable comments. We acknowledge that the field work was done in a region including the unceded and ancestral lands of native peoples of the Guiana Shield, who were displaced by force and disease from European colonists. We acknowledge that Stanford University resides on the unceded and ancestral lands of the Muwekma Ohlone people.

## Funding

This work was supported by a National Science Foundation CAREER award to LAO (IOS-1845651). DAS is supported by a National Science Foundation Graduate Research Fellowship (GRANT 2019255752) and the National Institutes of Health (T32GM007276). AP is supported by the European Union's Horizon 2020 research and innovation programme under the Marie Skłodowska-Curie grant agreement No 835530. LAO is a New York Stem Cell Robertson Investigator.

## Author contributions

Conceptualization: DAS (equal), AP (equal)

Methodology: DAS (equal), AP (equal)

Formal Analysis: DAS

Investigation: DAS

Resources: LAO (primary), AP (supporting)

Data Curation: DAS

Writing – original draft preparation: DAS

Writing – review and editing: DAS (equal), LAO (equal), AP (equal)

Visualization: DAS

Supervision: LAO (primary), AP (supporting)

Project administration: LAO (primary), AP (supporting)

Funding acquisition: DAS (supporting), LAO (primary), AP (supporting)

## Data Accessibility

Spreadsheets with raw data for baseline and translocation information are uploaded with supplementary information.

## References

- AmphibiaWeb.** 2021. <<https://amphibiaweb.org>> University of California, Berkeley, CA, USA.
- Allen, A. N.** (2013). An investigation of the roles of geomagnetic and acoustic cues in whale navigation and orientation.
- Beaupre, S. J., Jacobson, E. R., Lillywhite, H. B. and Zamudio, K.** (2004). Guidelines for use of live amphibians and reptiles in field and laboratory research. Revised by the Herpetological Animal Care and Use Committee (HACC) of the American Society of Ichthyologists and Herpetologists. *Lawrence (KS): The American Society of Ichthyologists and Herpetologists*.
- Boland, C. R. J.** (2004). Introduced cane toads *Bufo marinus* are active nest predators and competitors of rainbow bee-eaters *Merops ornatus*: observational and experimental evidence. *Biol. Conserv.* **120**, 53–62.
- Brattstrom, B. H.** (1962). Homing in the Giant Toad, *Bufo marinus*. *Herpetologica* **18**, 176–180.
- Brown, G. P., Phillips, B. L., Webb, J. K. and Shine, R.** (2006). Toad on the road: Use of roads as dispersal corridors by cane toads (*Bufo marinus*) at an invasion front in tropical Australia. *Biol. Conserv.* **133**, 88–94.
- Brown, G. P., Phillips, B. L. and Shine, R.** (2014). The straight and narrow path: the evolution of straight-line dispersal at a cane toad invasion front. *Proceedings of the Royal Society B: Biological Sciences* **281**, 20141385.
- Calenge, C.** (2020a). Package “adehabitatLT.” *R package version* 0.3.25, 18.
- Calenge, C.** (2020b). Package “adehabitatHR”. *R package version* 0.4. 18.
- Carpenter, C. C. and Gillingham, J. C.** (1987). Water Hole Fidelity in the Marine Toad, *Bufo marinus*. *J. Herpetol.* **21**, 158–161.
- DeVore, J. L., Shine, R. and Ducatez, S.** (2021). Spatial ecology of cane toads (*Rhinella marina*) in their native range: a radiotelemetric study from French Guiana. *Sci. Rep.* **11**, 1–15.
- Evans, M., Yáber, C. and Hero, J.-M.** (1996). Factors Influencing Choice of Breeding Site by *Bufo marinus* in Its Natural Habitat. *Copeia* **1996**, 904–912.
- Freeland, W. J., and S. H. Kerin.** (1991) Ontogenetic Alteration of Activity and Habitat Selection by *Bufo marinus*. *Wildlife Research* **18 (4)**, 431.



- Hamilton, N. H. R., Halliday, D. C. T., Tarmo, S., Bray, J., Venables, D. and Robinson, T.** (2005). Captive Care and Breeding of Marine Toads, *Bufo marinus*. *J. Herpetol. Med. Surg.* **15**, 21–27.
- Kelehear, C. and Shine, R.** (2020). Tradeoffs between dispersal and reproduction at an invasion front of cane toads in tropical Australia. *Scientific Reports* **10**,.
- Liu, Y., Day, L. B., Summers, K. and Burmeister, S. S.** (2019). A cognitive map in a poison frog. *J. Exp. Biol.* **222**,.
- Lohmann, K. J., Lohmann, C. M. F., Ehrhart, L. M., Bagley, D. A. and Swing, T.** (2004). Geomagnetic map used in sea-turtle navigation. *Nature* **428**, 909–910.
- Mouritsen, H.** (2018). Long-distance navigation and magnetoreception in migratory animals. *Nature* **558**, 50–59.
- Mouritsen, H. and Ritz, T.** (2005). Magnetoreception and its use in bird navigation. *Curr. Opin. Neurobiol.* **15**, 406–414.
- Pašukonis, A., Warrington, I., Ringler, M. and Hödl, W.** (2014a). Poison frogs rely on experience to find the way home in the rainforest. *Biol. Lett.* **10**, 20140642.
- Pašukonis, A., Loretto, M.-C., Landler, L., Ringler, M. and Hödl, W.** (2014b). Homing trajectories and initial orientation in a Neotropical territorial frog, *Allobates femoralis* (Dendrobatidae). *Front. Zool.* **11**, 29.
- Pašukonis, A., Loretto, M.-C. and Hödl, W.** (2018). Map-like navigation from distances exceeding routine movements in the three-striped poison frog (*Ameerega trivittata*). *J. Exp. Biol.* **221**,.
- Pettit, L. J., Greenlees, M. J. and Shine, R.** (2016). Is the enhanced dispersal rate seen at invasion fronts a behaviourally plastic response to encountering novel ecological conditions? *Biol. Lett.* **12**,.
- Phillips, B. L. and Shine, R.** (2005). The morphology, and hence impact, of an invasive species (the cane toad, *Bufo marinus*): changes with time since colonisation. *Animal Conservation forum* **8**, 407–413.
- Phillips, J. B., Adler, K. and Borland, S. C.** (1995). True navigation by an amphibian. *Anim. Behav.* **50**, 855–858.
- Phillips, B. L., Brown, G. P., Webb, J. K. and Shine, R.** (2006). Invasion and the evolution of speed in toads. *Nature* **439**, 803.
- Phillips, B. L., Brown, G. P., Greenlees, M., Webb, J. K. and Shine, R.** (2007). Rapid expansion of the cane toad (*Bufo marinus*) invasion front in tropical Australia. *Austral Ecol.* **32**, 169–176.
- Roland, A. B. and O'Connell, L. A.** (2015). Poison frogs as a model system for studying the neurobiology of parental care. *Current Opinion in Behavioral Sciences* **6**, 76–81.
- Schwarzkopf, L. and Alford, R. A.** (2002). Nomadic movement in tropical toads. *Oikos* **96**, 492–506.

- Sinsch, U.** (1987). Orientation behaviour of toads (*Bufo bufo*) displaced from the breeding site. *J. Comp. Physiol. A* **161**, 715–727.
- Sinsch, U.** (1990). The Orientation Behaviour of Three Toad Species (genus "bufo") Displaced from the Breeding Site (p. 75). Fischer.
- Sinsch, U.** (1991). Mini-review: the orientation behaviour of amphibians. *Herpetol. J.* **1**, 1–544.
- Sinsch, U.** (1992). Sex-biassed site fidelity and orientation behaviour in reproductive natterjack toads (*Bufo calamita*). *Ethol. Ecol. Evol.* **4**, 15–32.
- Sinsch, U.** (2006). Orientation and navigation in Amphibia. *Mar. Freshw. Behav. Physiol.* **39**, 65–71.
- Stynoski, J. L.** (2009). Discrimination of offspring by indirect recognition in an egg-feeding dendrobatid frog, *Oophaga pumilio*. *Anim. Behav.* **78**, 1351–1356.
- Twitty, V., Grant, D. and Anderson, O.** (1964). LONG DISTANCE HOMING IN THE NEWT *TARICHA RIVULARIS*. *Proc. Natl. Acad. Sci. U. S. A.* **51**, 51–58.
- Urban, M. C., Phillips, B. L., Skelly, D. K. and Shine, R.** (2008). A toad more traveled: the heterogeneous invasion dynamics of cane toads in Australia. *Am. Nat.* **171**, E134–48.
- Vitale, A., Calisi, R., Carere, C., Carter, T., Ha, J. C., Hubrecht, R., Jennings, D., Metcalfe, N., Ophir, A. G., Ratcliffe, J. M., et al.** (2018). Guidelines for the treatment of animals in behavioural research and teaching. *Anim. Behav.* **135**, i–x.
- Ward-Fear, G., Greenlees, M. J. and Shine, R.** (2016). Toads on Lava: Spatial Ecology and Habitat Use of Invasive Cane Toads (*Rhinella marina*) in Hawai'i. *PLoS One* **11**, e0151700.
- Wittlinger, M., Wehner, R. and Wolf, H.** (2006). The ant odometer: stepping on stilts and stumps. *Science* **312**, 1965–1967.
- Zug, G. R. and Zug, P. B.** (1979). The marine toad, *Bufo marinus*: a natural history resume of native populations. *Smithson. Contrib. Zool.*

## Figures

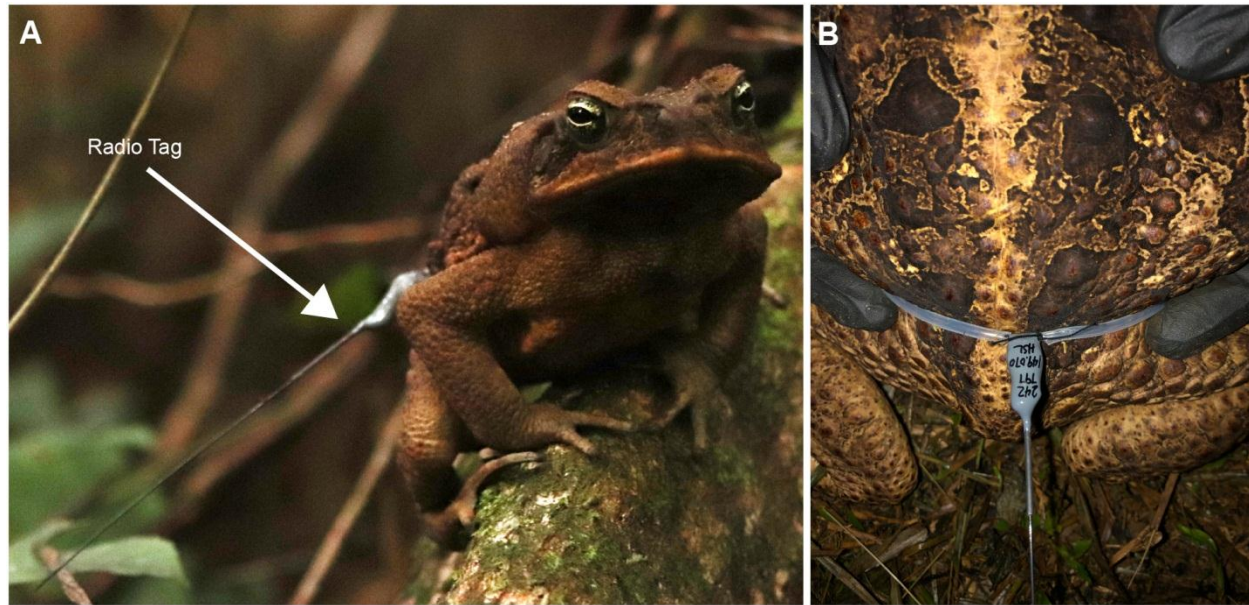

**Figure 1. Toads tagged with radio transmitters.** (A) A male toad with an attached radio transmitter. (B) Close up of a radio transmitter attached to a toad waist with a belt of silicone tubing.

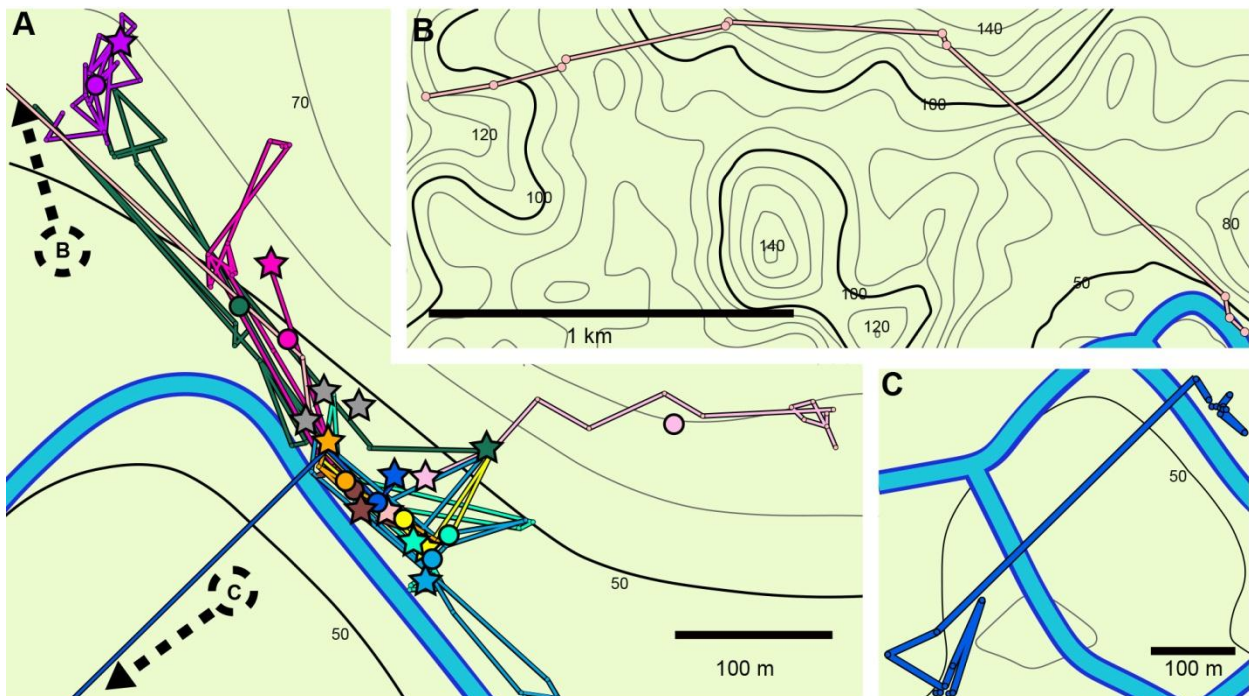

**Figure 2. Baseline tracking of *Rhinella marina*.** (A) Baseline tracking for 10 toads (over 7-55 days) showing site fidelity; colors represent individuals. Location points are connected in temporal order. Larger circles represent the mean center of baseline position. Stars represent tagging locations and gray stars represent toads that were tagged but not substantially tracked. Dashed arrows point to areas represented by panels (B) and (C). Contours represent 10 meter changes in elevation (elevation data from Open Street Maps) and reference contour labels indicate elevation as meters above sea level. (B) One female toad did not show site fidelity and moved 2 kilometers without translocation. (C) A male toad was initially localized near other males but was moved across the river while in amplexus.



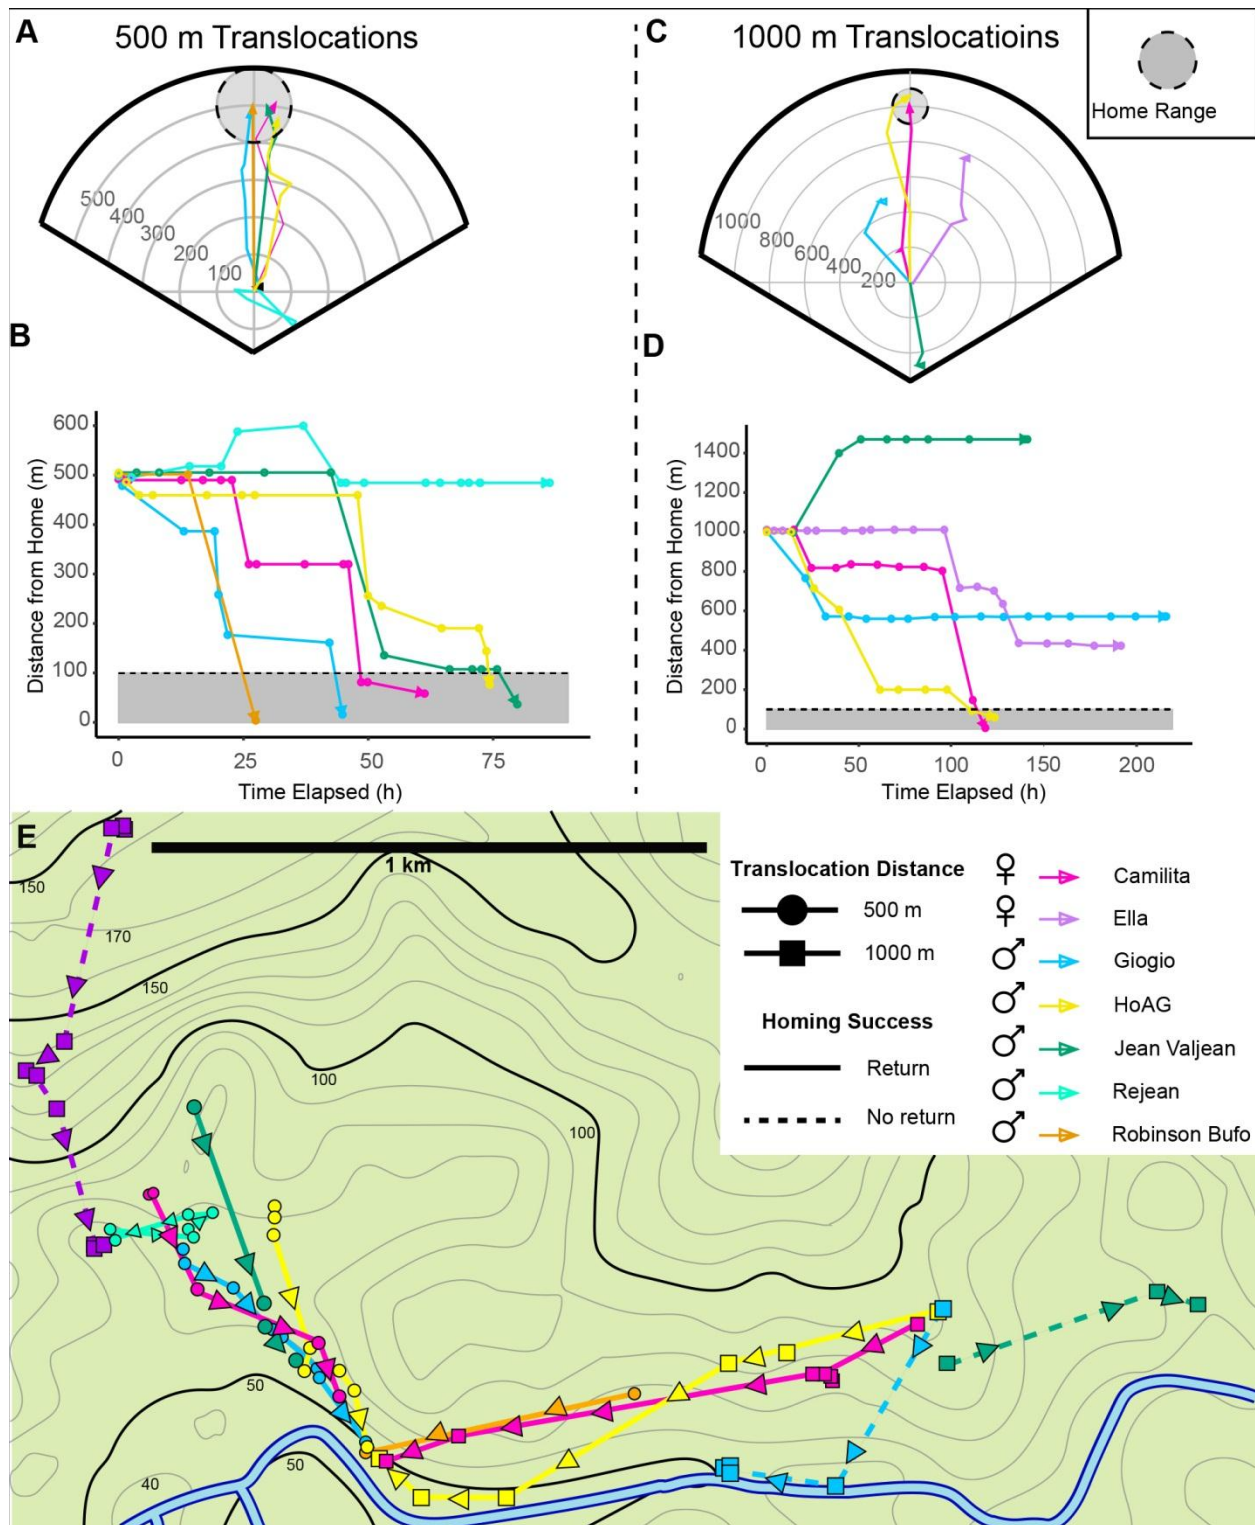

**Figure 3. Homing trajectories of translocated *Rhinella marina*. 287** (A) Homing trajectories of toads translocated 500 meters. Plot center represents translocation sites and gray circle represents home area. (B) Distance from home plotted against time after translocation during homing from 500 m, with a gray rectangle representing the home area. (C) Homing trajectories and (D) distance from home over time for toads translocated 1000 m. (E) Movement of toads after translocation on a map of the field site; solid lines show successful returns and dashed lines represent failure to home. Contours represent 10 293 meter changes in elevation (elevation data from Open Street Maps) and contour labels indicate elevation as meters above sea level.

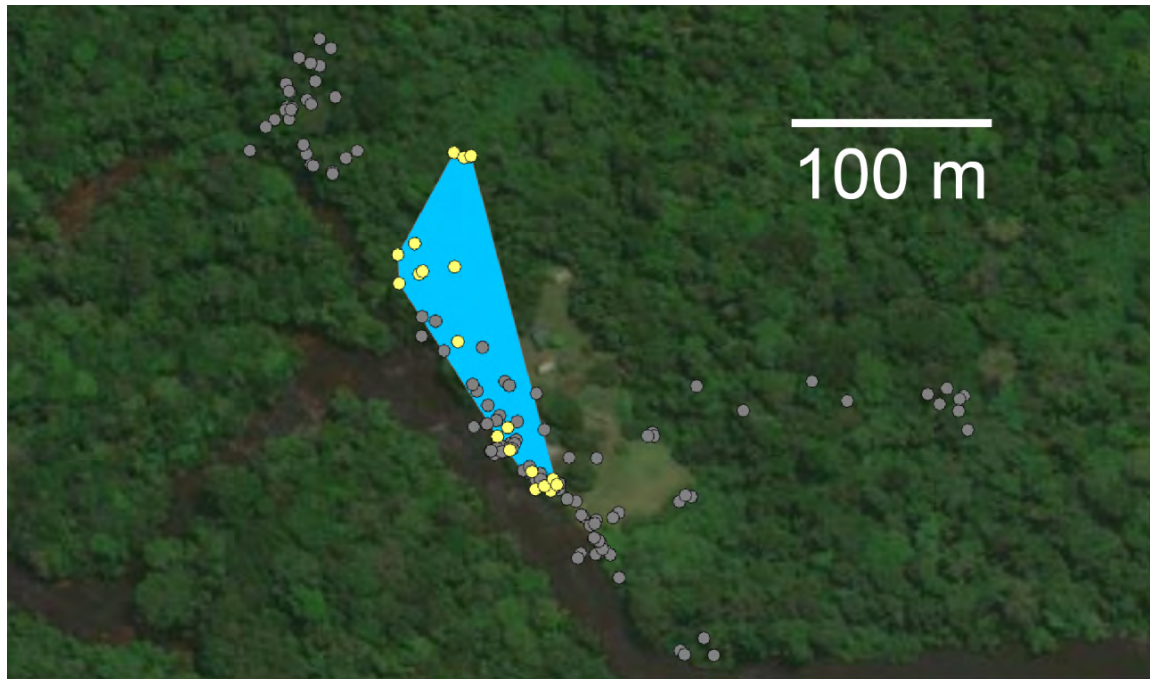

A. Camilita (5568.7 m<sup>2</sup>, 31 days)  
SVL = 18.0 cm  
mass = 0.57 kg

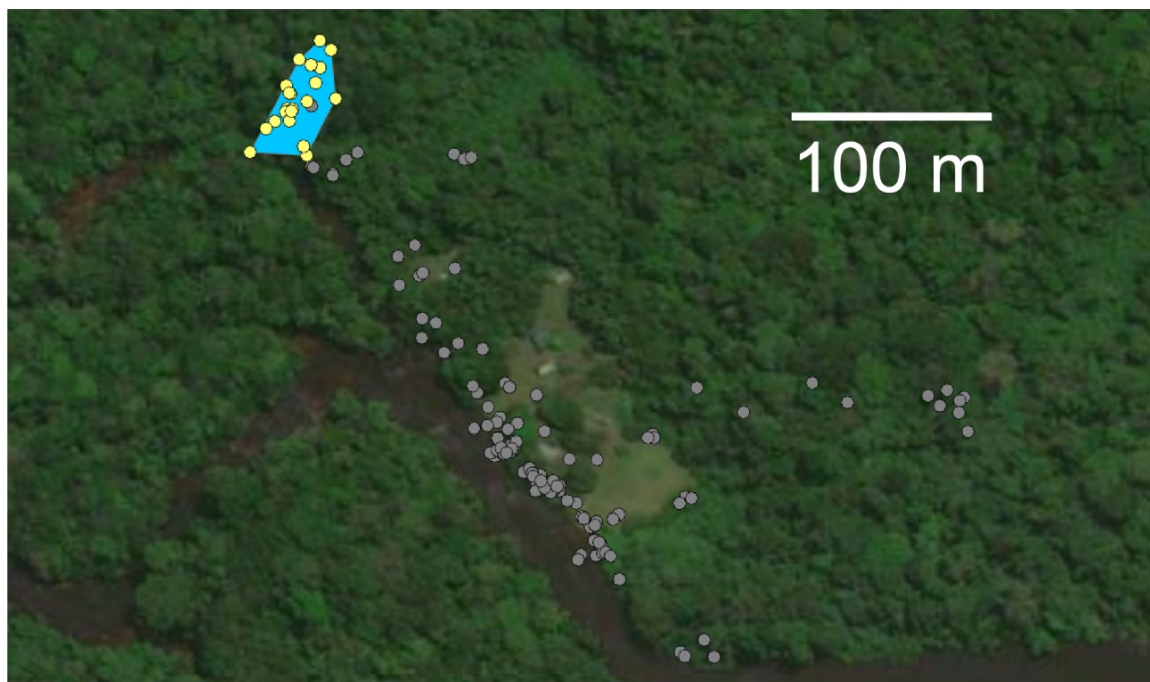

B. Ella (1329.6 m<sup>2</sup>, 55 days)  
SVL = 24.0 cm  
mass = 1.16 kg



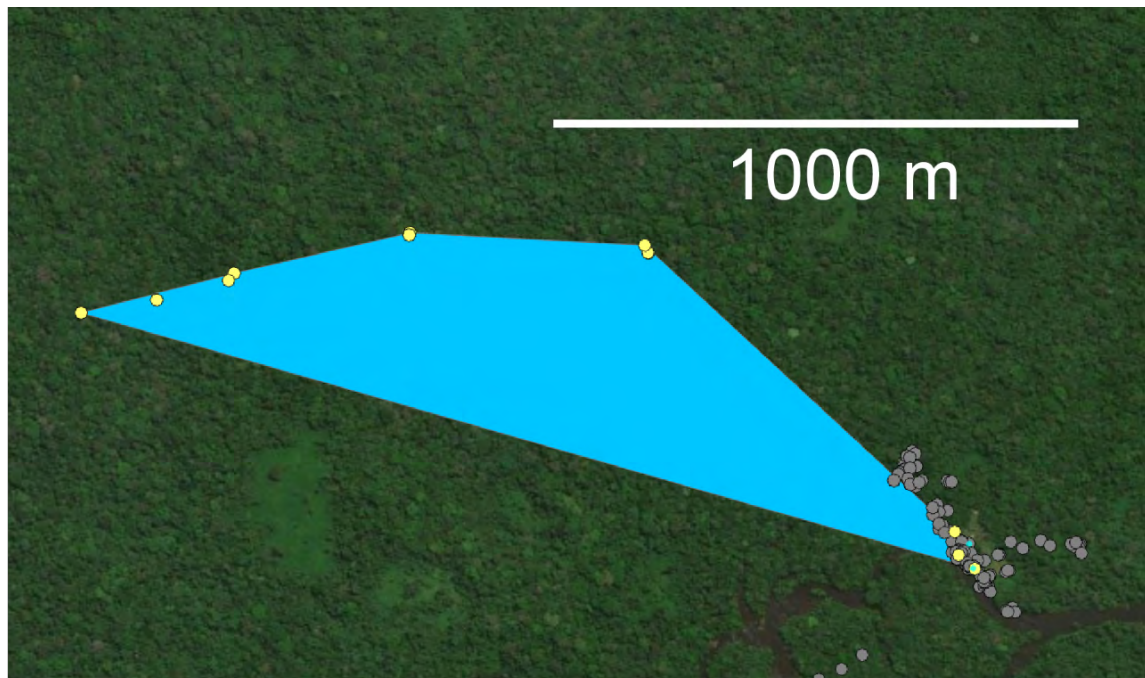

C. Eponine (\*, 16 days)  
SVL = 23.5 cm  
mass = 1.52 kg

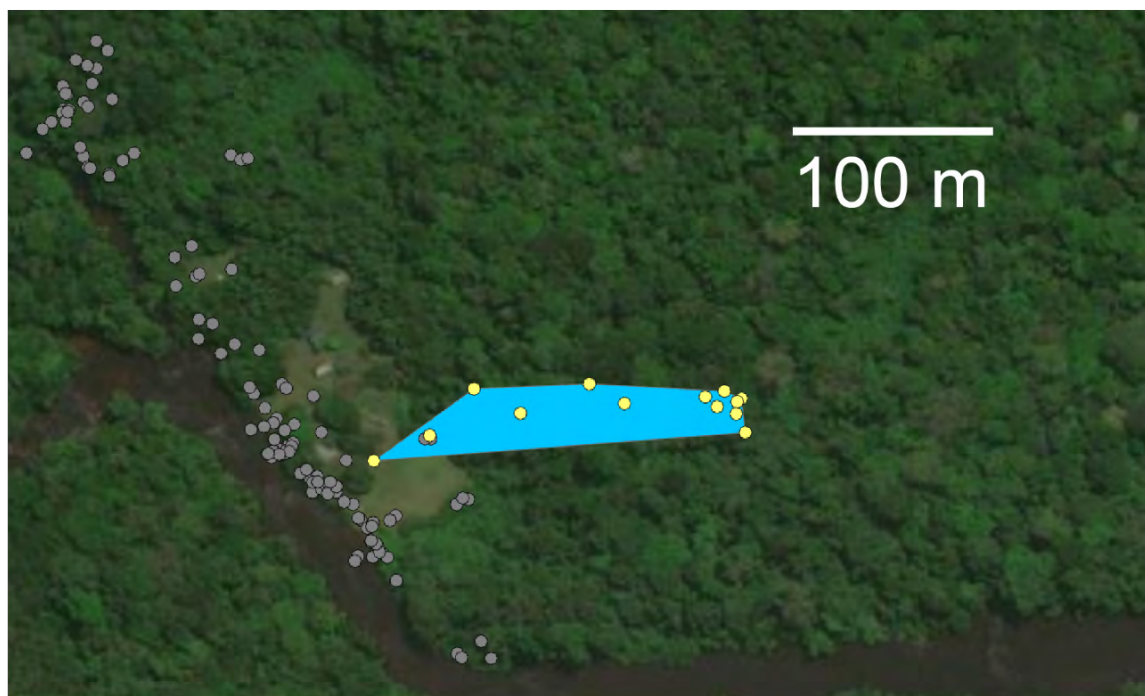

D. Fantine (4522.1 m<sup>2</sup>, 13 days)  
SVL = 21.0 cm  
mass = 1.71 kg

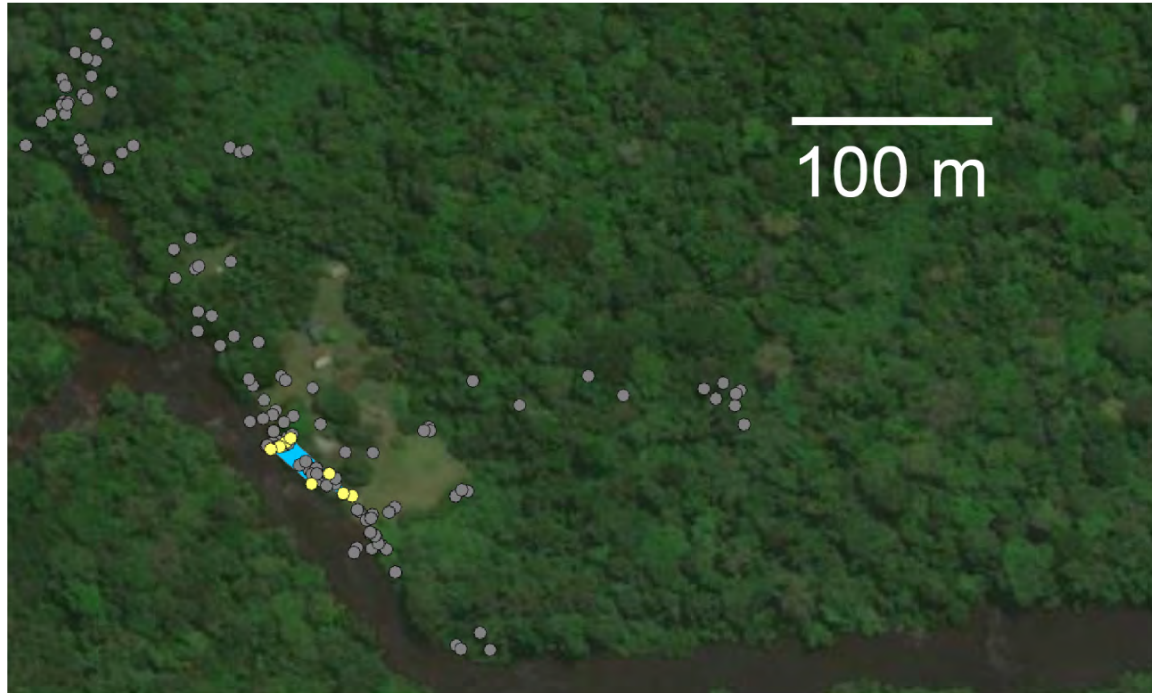

E. Fantomas (352.3 m<sup>2</sup>, 7 days)  
SVL = 14.5 cm  
mass = 0.27 kg

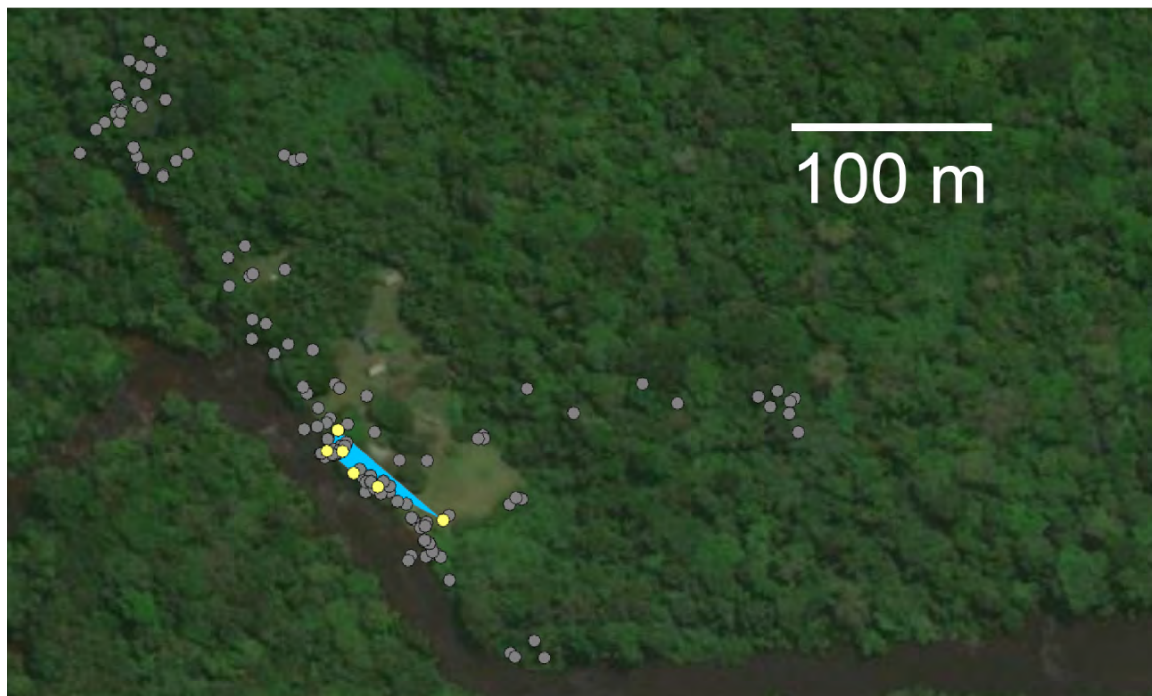

F. Gavroche (498.6 m<sup>2</sup>, 7 days)  
SVL = 11.5 cm  
mass = 0.28 kg



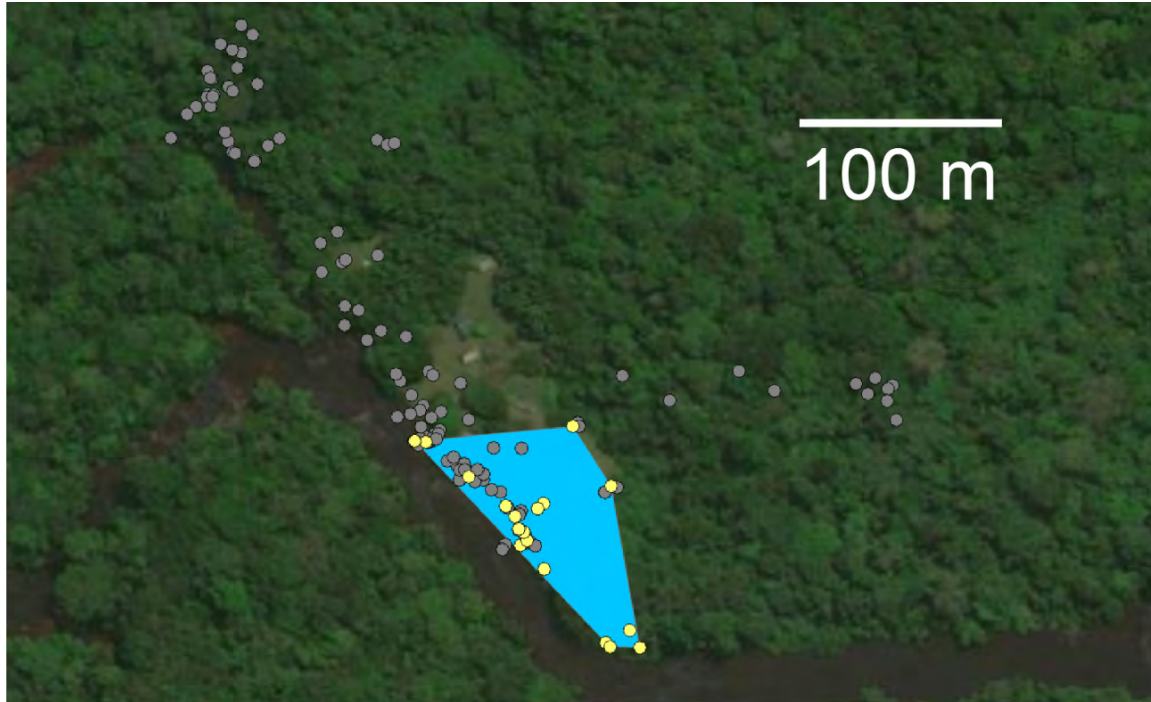

G. Giggio (5697.0 m<sup>2</sup>, 41 days)  
SVL = 14.5 cm  
mass = 0.36 kg

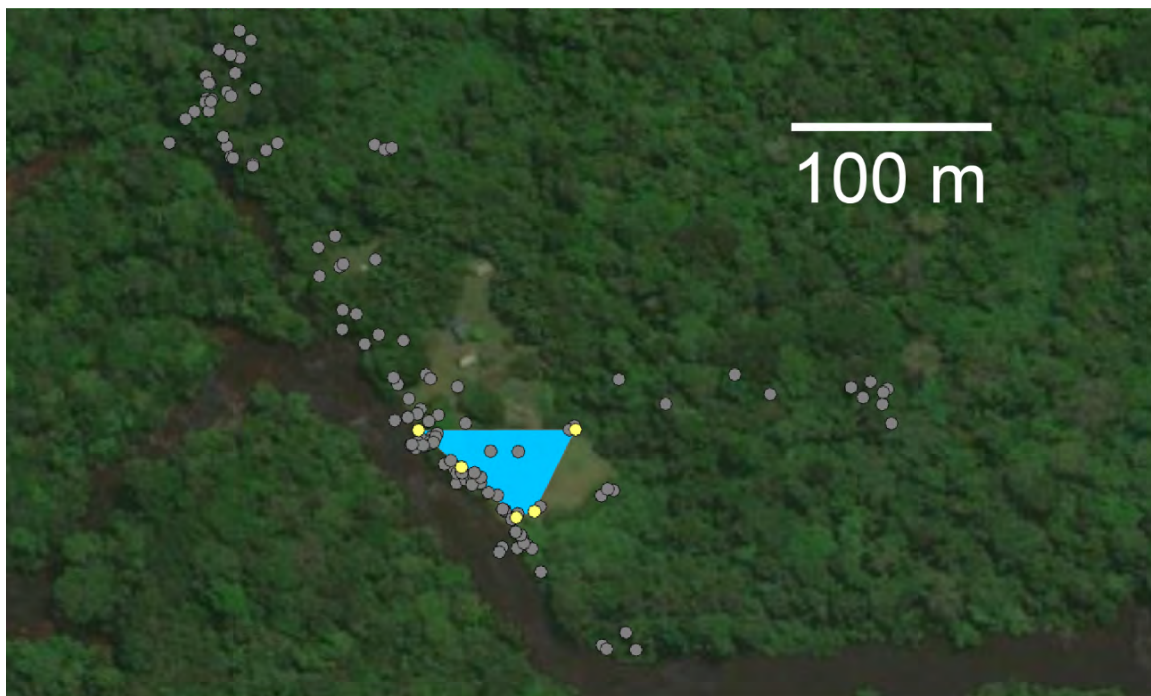

H. tHoAG (1856.0 m<sup>2</sup>, 15 days)  
SVL = 15.5 cm  
mass = 0.34 kg



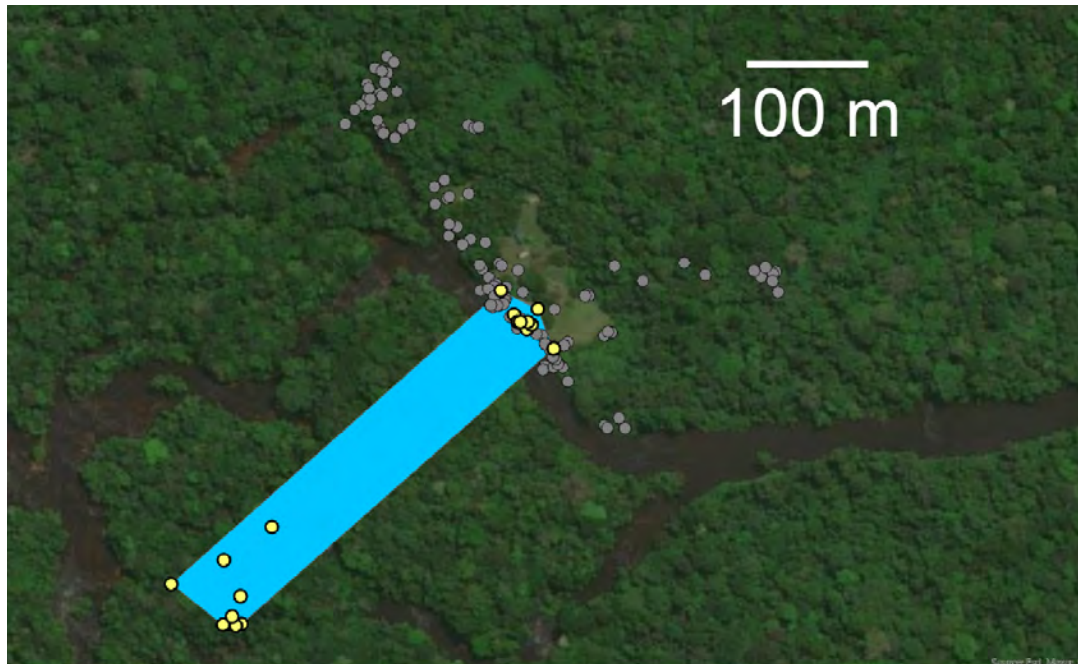

I(i). Javert, all points (23465.9 m<sup>2</sup>, 36 days)  
SVL = 18.0 cm  
mass = 0.47 kg

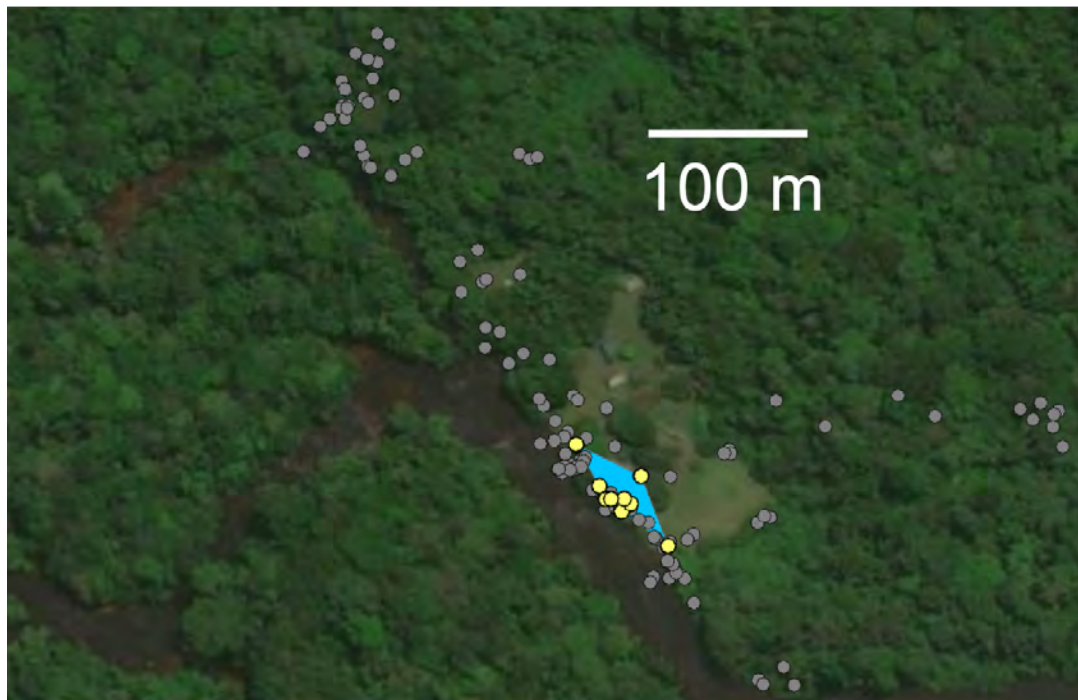

I(ii). Javert, pre-translocation (640.5 m<sup>2</sup>, 21 days)

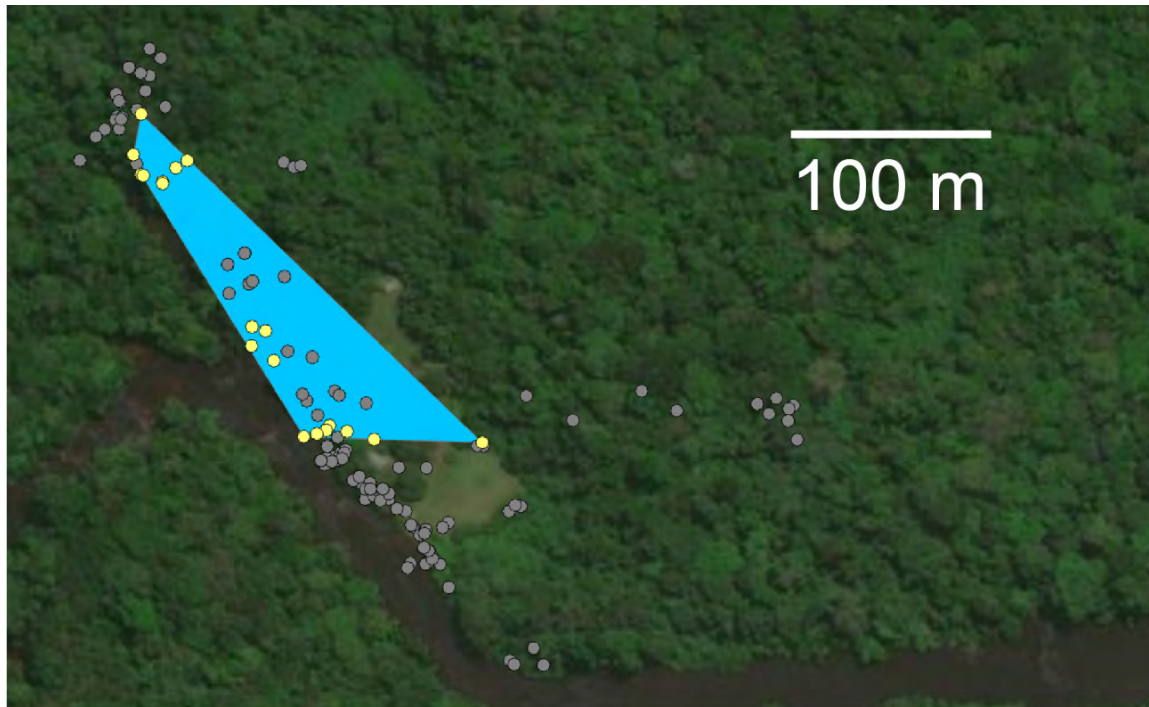

J. Jean Valjean (8375.1 m<sup>2</sup>, 30 days)  
SVL = 14.5 cm  
mass = 0.34 kg

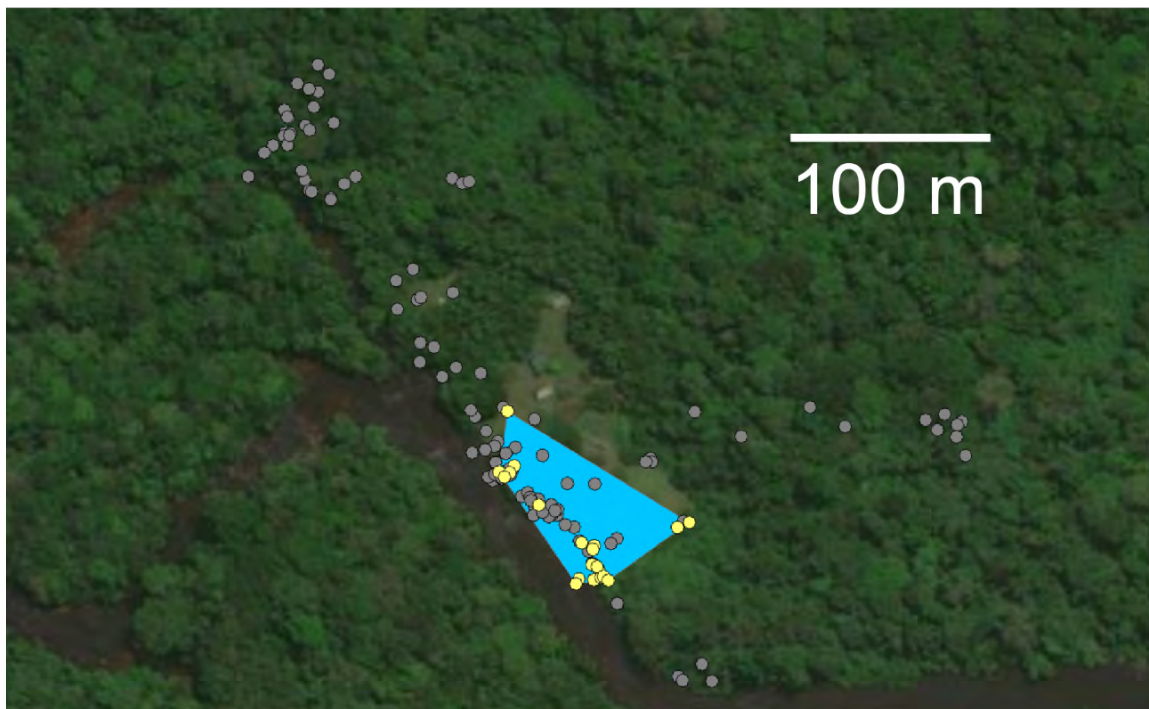

K. Rejean (3868.4 m<sup>2</sup>, 38 days)  
SVL = 14.5 cm  
mass = 0.31 kg

**Fig. S1. Baseline tracking of individual toads.** (A-K) Each panel depicts one of the 11 toads tracked  $\geq 7$  days. Highlighted yellow points mark locations where toad was found and blue polygon depicts the minimum convex polygon (MCP) surrounding the points. Gray points represent locations where other toads were found. In parentheses, the area of the (MCP) and the total number of days the animal was tracked (unadjusted) are given. Measurements of Snout-vent-length (SVL) and mass taken upon untagging of the animals are provided.

Panel I is divided into two parts, one showing all points recorded for Javert (i), and the second showing all points prior to Javert being translocated across a river while in amplexus (ii).

\*No area provided because animal exhibited unidirectional movement

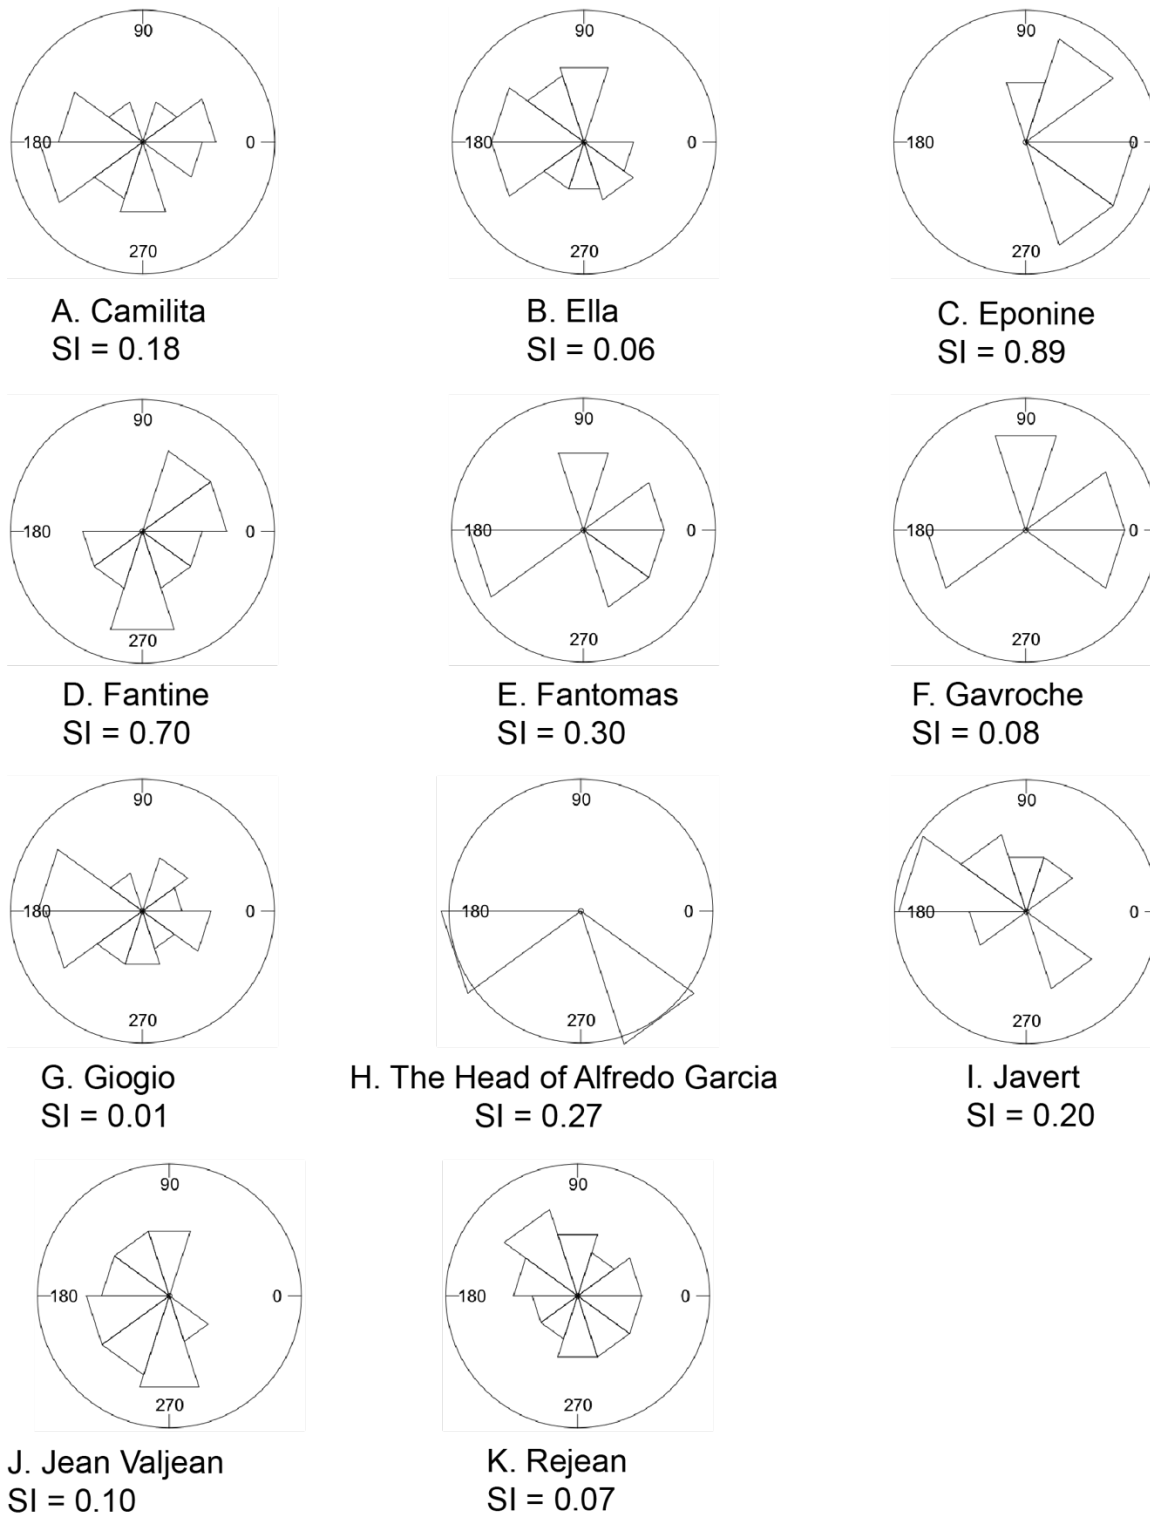

**Fig. S2. Distribution of relative turn angles during baseline tracking.** (A-K) Rose diagrams for 11 toads tracked for  $\geq 7$  days distributing relative turn angles between movements into ten bins. Clustering of turn angles at 0 degrees indicates unidirectional movement. Straightness Index (SI) calculated for the movement of each toad by dividing net displacement by cumulative path over observation.

**Table S1.**

[Click here to download Table S1](#)

**Table S2.**

[Click here to download Table S2](#)
